# Supplementary material for: Synthesis, DFT, molecular dynamics, and Monte Carlo simulation of a novel thiourea derivative with extraordinary inhibitive properties for mild steel in 0.5 M sulphuric acid
Source: Royal Society of Chemistry journal article supplement (doi:10.1039/d3cp00139c), 2023-01-01
Supplement: d3cp00139c1.pdf [file d3cp00139c1.pdf]

## Supplementary data

### **Synthesis, DFT, molecular dynamics, and Monte Carlo simulation of novel thiourea derivative with extraordinary inhibitive properties for mild steel in 0.5 M sulphuric acid**

*Ahmed M. Hegazy<sup>a</sup>, Nesreen S. Haiba<sup>b</sup>, Mohamed K. Awad<sup>c\*</sup>, and Fatma M. Mahgoub<sup>a</sup>*

<sup>a</sup> Department of Materials Science, Institute of Graduate Studies and Research, Alexandria University, Egypt

<sup>b</sup> Department of Chemistry and Physics, Faculty of Education, Alexandria University, Egypt

<sup>c</sup> Theoretical Applied Chemistry Unit (TACU), Chemistry Department, Faculty of Science, Tanta University, Egypt

## Table of contents

| <b>Figure number</b>   | <b>Figure name</b>                                                                                                                                                                                                                                                                                                               | <b>Page</b> |
|------------------------|----------------------------------------------------------------------------------------------------------------------------------------------------------------------------------------------------------------------------------------------------------------------------------------------------------------------------------|-------------|
| S1                     | FT-IR spectrum of inhibitor 2-amino- <i>N</i> -(phenylcarbamoithioyl) benzamide.                                                                                                                                                                                                                                                 | 3           |
| S2                     | <sup>1</sup> H-NMR (DMSO- <i>d</i> <sub>6</sub> ) spectrum of 2-amino- <i>N</i> -(phenylcarbamoithioyl) benzamide.                                                                                                                                                                                                               | 4           |
| S3                     | <sup>13</sup> C-NMR (DMSO- <i>d</i> <sub>6</sub> ) spectrum of 2-amino- <i>N</i> -(phenylcarbamoithioyl) benzamide.                                                                                                                                                                                                              | 5           |
| S4                     | <b>(a)</b> Experimental and fitted Nyquist plots for MS in the presence of 2 x 10 <sup>-5</sup> M of APCB. <b>(b)</b> Experimental and fitted Bode plots for MS in the presence of 2 x 10 <sup>-5</sup> M of APCB. <b>(c)</b> Experimental and fitted phase angle plots for MS in the presence of 2 x 10 <sup>-5</sup> M of APCB | 6           |
| S5                     | Temkin isotherm for adsorption of APCB on MS in 0.5M H <sub>2</sub> SO <sub>4</sub> .                                                                                                                                                                                                                                            | 7           |
| S6                     | Flory-Huggins isotherm for adsorption of APCB on steel in 0.5M H <sub>2</sub> SO <sub>4</sub> .                                                                                                                                                                                                                                  | 8           |
| S7                     | Kinetic-thermodynamic isotherm for adsorption of APCB on steel in 0.5M H <sub>2</sub> SO <sub>4</sub> .                                                                                                                                                                                                                          | 8           |
| S8                     | <b>(a)</b> Arrhenius plot for MS in 0.5M H <sub>2</sub> SO <sub>4</sub> in the absence and presence of various concentrations of APCB. <b>(b)</b> Eyring plot for MS in 0.5M H <sub>2</sub> SO <sub>4</sub> in the absence and presence of various concentrations of APCB.                                                       | 9           |
| S9                     | Energies of HOMO and LUMO levels of protonated APCB in the gas phase, THF, and water.                                                                                                                                                                                                                                            | 10          |
| S10                    | Relation between the adsorption energy and number of molecules obtained from MC simulations.                                                                                                                                                                                                                                     | 13          |
| <b>Table number</b>    | <b>Table name</b>                                                                                                                                                                                                                                                                                                                | <b>Page</b> |
| S1                     | Langmuir adsorption isotherm parameters.                                                                                                                                                                                                                                                                                         | 7           |
| S2                     | Activation parameters obtained from Arrhenius equation and Eyring equation.                                                                                                                                                                                                                                                      | 9           |
| S3                     | Mulliken charges and Fukui functions of different atoms in neutral APCB in the gas phase.                                                                                                                                                                                                                                        | 11          |
| S4                     | Quantum chemical parameters for protonated APCB in the gas phase, THF, and water solvents.                                                                                                                                                                                                                                       | 12          |
| S5                     | Parameters obtained from Monte Carlo simulation.                                                                                                                                                                                                                                                                                 | 12          |
| <b>Equation number</b> | <b>Equations S1-S3</b>                                                                                                                                                                                                                                                                                                           | <b>7</b>    |

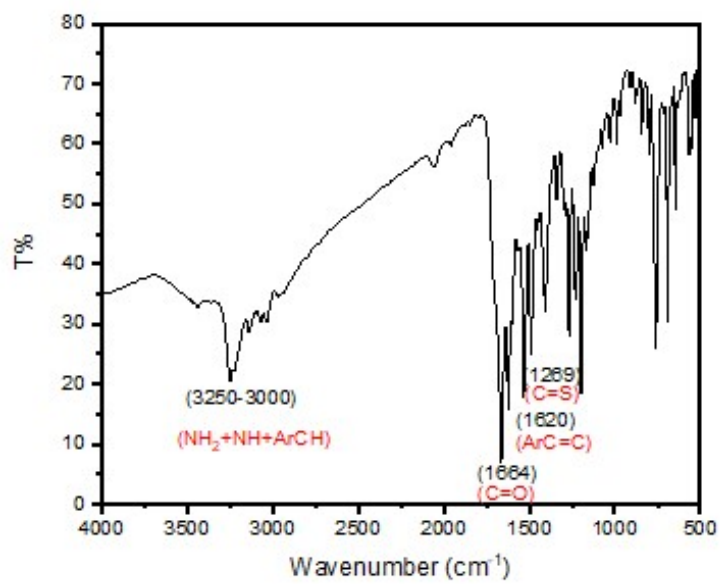

**Fig. S1** FT-IR spectrum of inhibitor 2-amino-*N*-(phenylcarbamothioyl) benzamide.

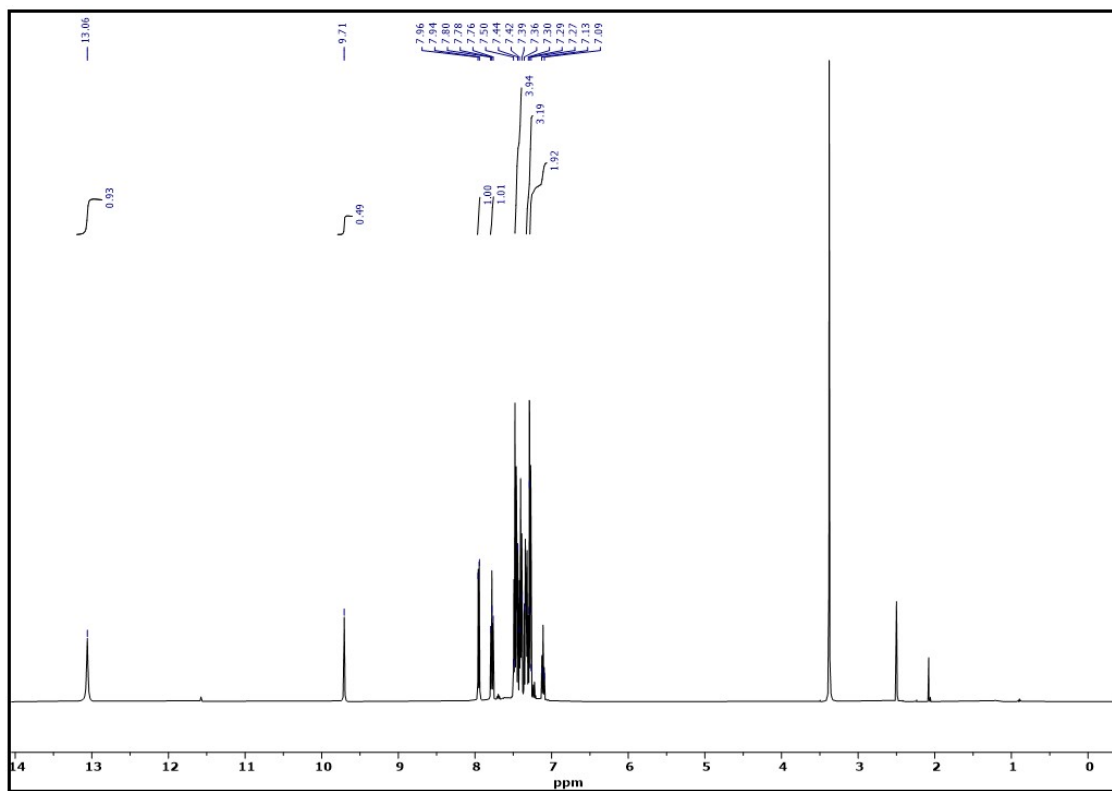

**Fig. S2** <sup>1</sup>H-NMR (DMSO-*d*<sub>6</sub>) spectrum of 2-amino-*N*-(phenylcarbamothioyl)benzamide.

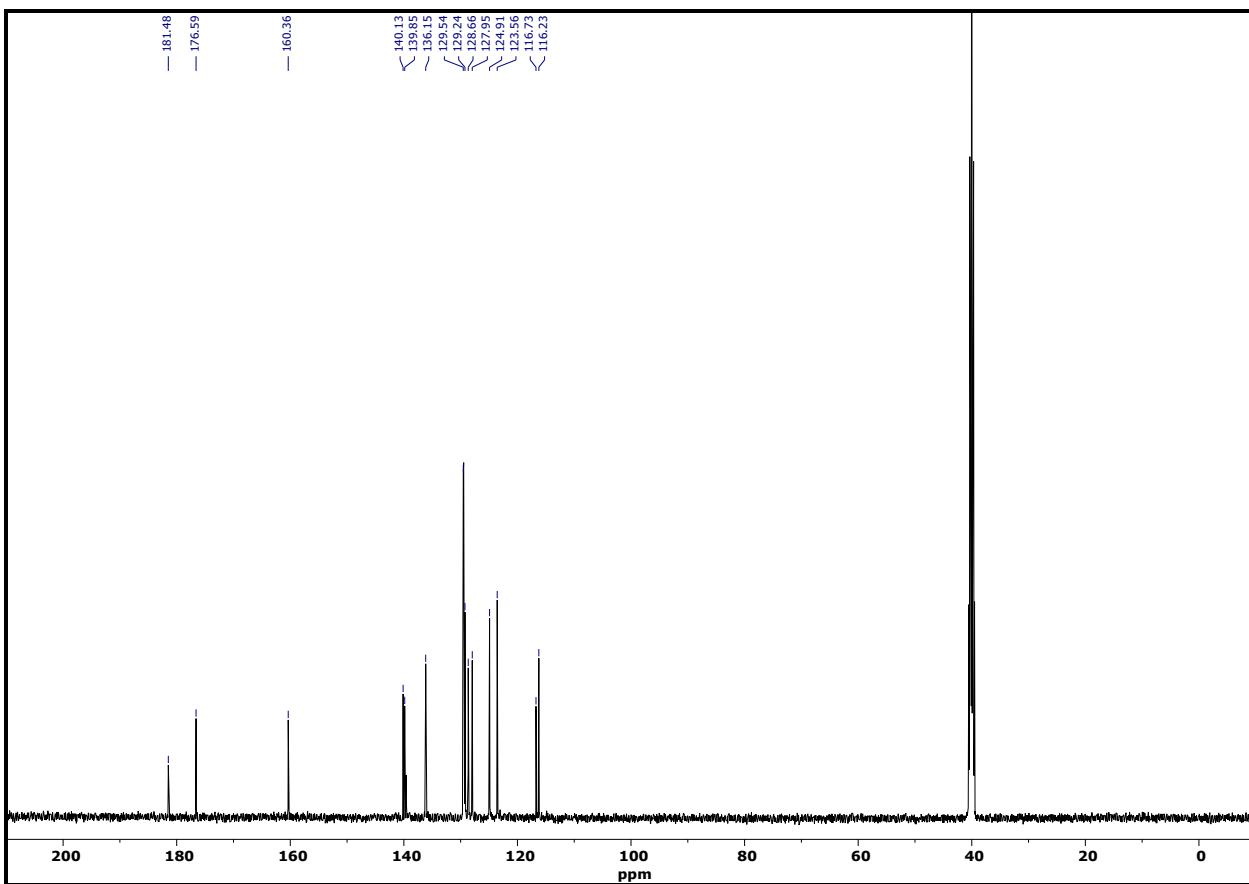

**Fig. S3**  $^{13}\text{C}$ -NMR (DMSO- $d_6$ ) spectrum of 2-amino-*N*-(phenylcarbamothioyl)benzamide.

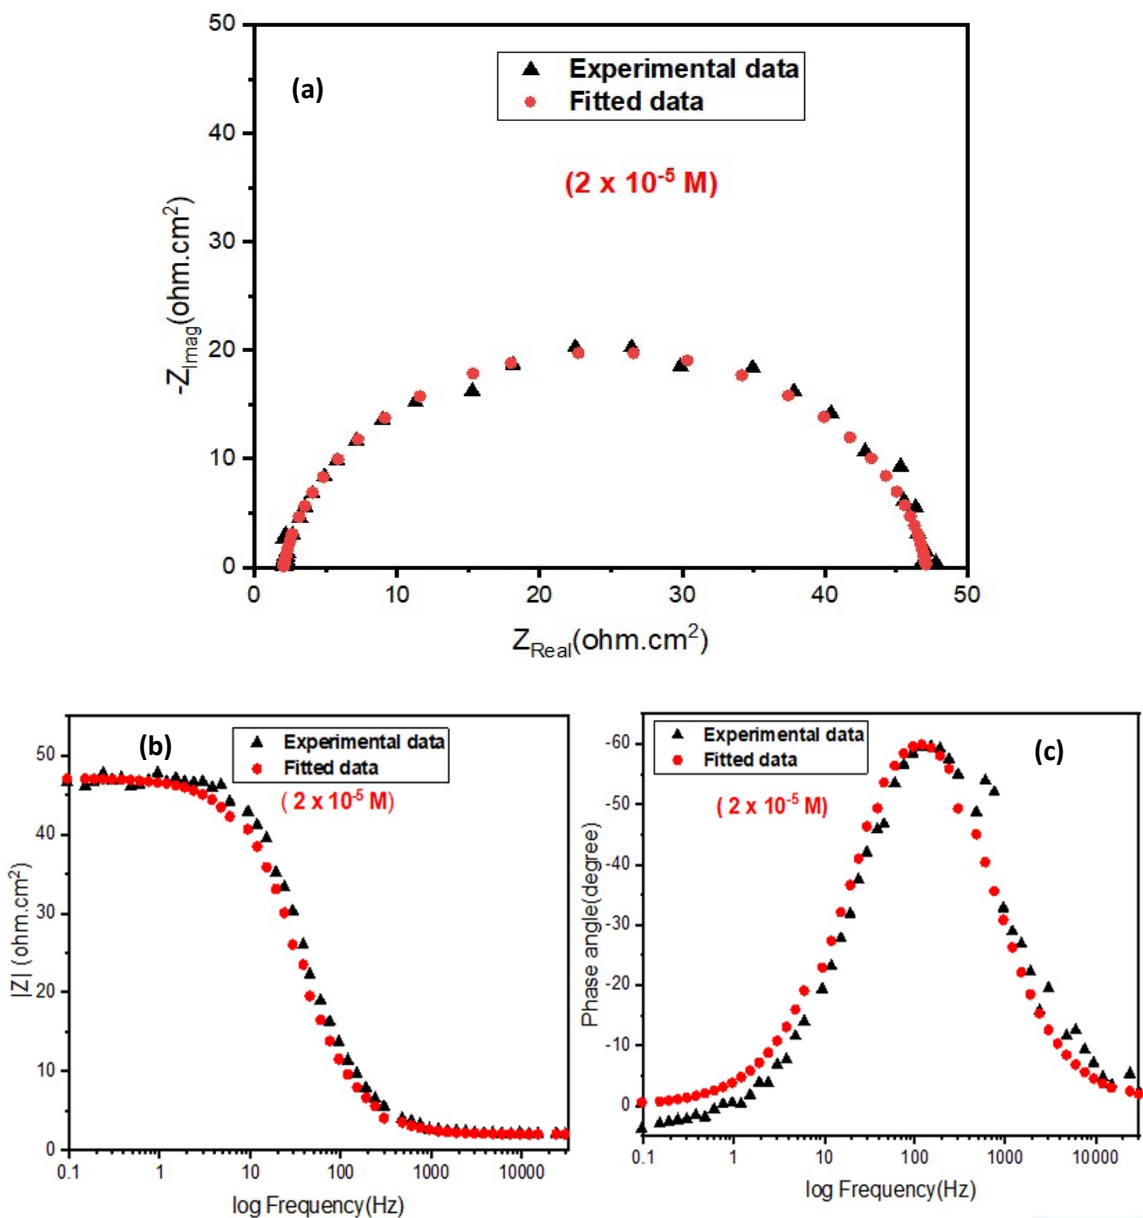

**Fig.S4 (a)** Experimental and fitted Nyquist plots for MS in the presence of  $2 \times 10^{-5}$  M of APCB. **(b)** Experimental and fitted Bode plots for MS in the presence of  $2 \times 10^{-5}$  M of APCB. **(c)** Experimental and fitted phase angle plots for MS in the presence of  $2 \times 10^{-5}$  M of APCB

$$\log\left(\frac{\theta}{1-\theta}\right) = \log k' + y \cdot \log C \quad k_{ads} = k'^{\frac{1}{y}} \quad (\text{Eq.S1})$$

$$\log\left(\frac{\theta}{C}\right) = \log x \cdot k_{ads} + x \log(1-\theta) \quad (\text{Eq.S2})$$

$$\theta = \frac{1}{f} \ln k_{ads} + \frac{1}{f} \ln C \quad (\text{Eq.S3})$$

**Table S1.** Langmuir adsorption isotherm parameters.

| T (K) | $K_{ads}$ | $-\Delta G_{ads}^0$ (kJ/mol) | $R^2$  |
|-------|-----------|------------------------------|--------|
| 303   | 115207    | 39.45                        | 0.9983 |
| 313   | 253807    | 42.81                        | 0.9999 |
| 323   | 277777    | 44.42                        | 0.9997 |
| 333   | 306654    | 46.70                        | 0.9998 |

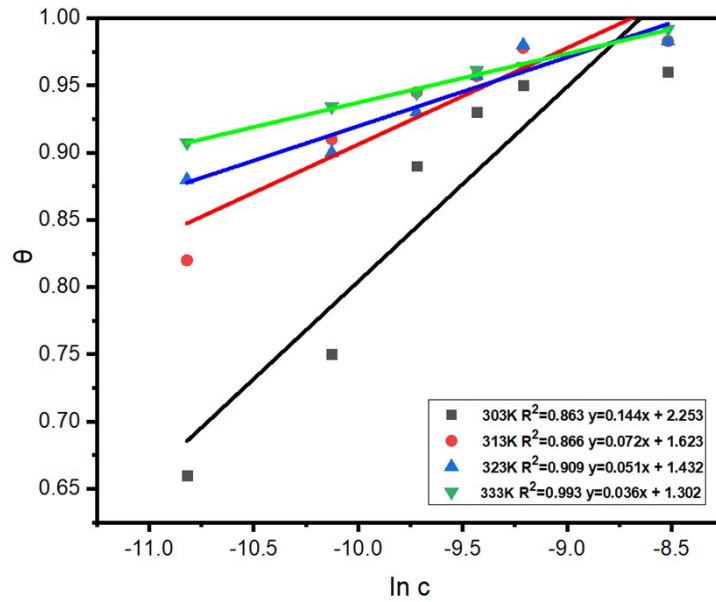

**Fig. S5** Temkin isotherm for adsorption of APCB on MS in 0.5M H<sub>2</sub>SO<sub>4</sub>.

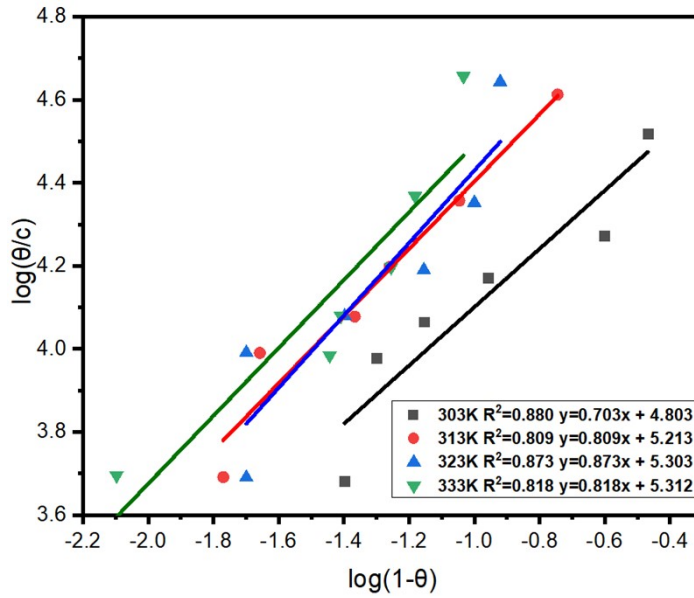

**Fig. S6** Flory-Huggins isotherm for adsorption of APCB on steel in 0.5M H<sub>2</sub>SO<sub>4</sub>.

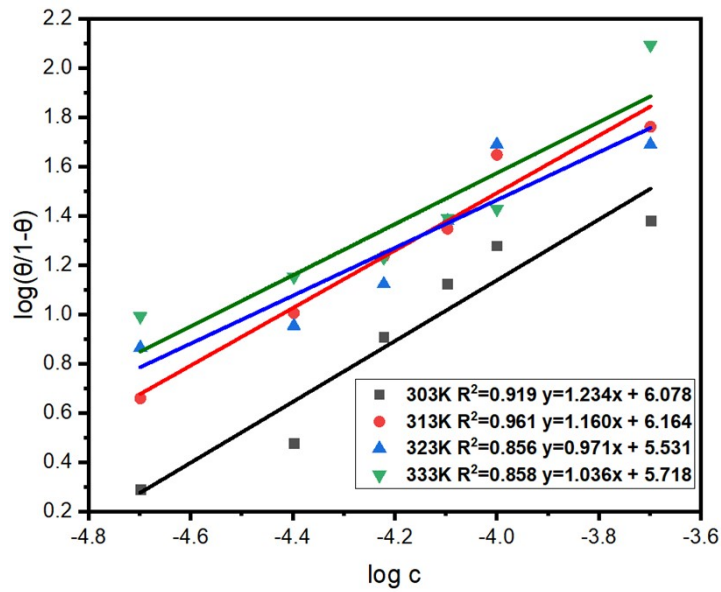

**Fig. S7** Kinetic-thermodynamic isotherm for adsorption of APCB on steel in 0.5M H<sub>2</sub>SO<sub>4</sub>.



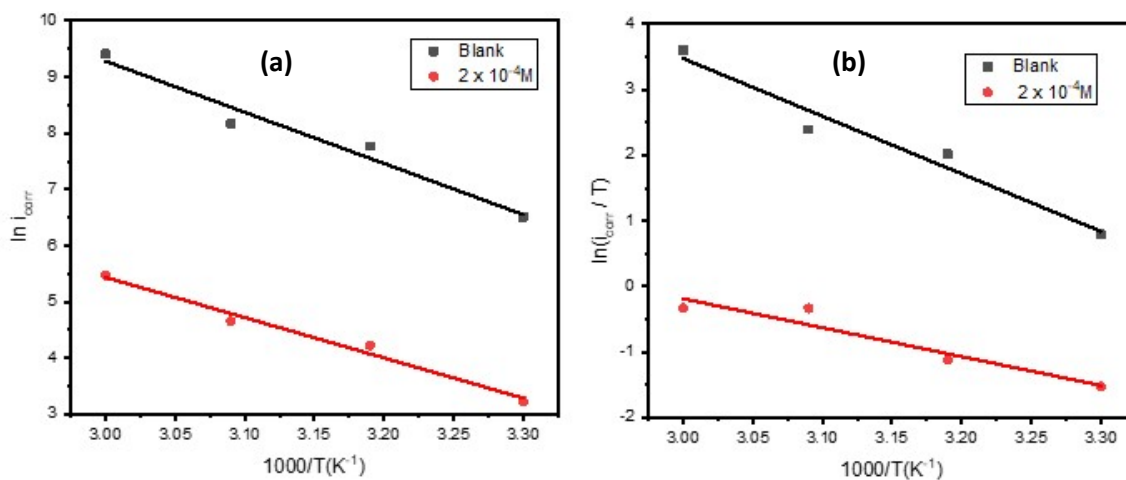

**Fig. S8 (a)** Arrhenius plot for MS in 0.5M H<sub>2</sub>SO<sub>4</sub> in the absence and presence of various concentrations of APCB. **(b)** Eyring plot for MS in 0.5M H<sub>2</sub>SO<sub>4</sub> in the absence and presence of various concentrations of APCB.

**Table S2.** Activation parameters obtained from Arrhenius equation and Eyring equation.

| APCB Concentration(M) | E <sub>a</sub> (kJ/mol) | ΔH <sup>‡</sup> (kJ/mol) | ΔS <sup>‡</sup> (J/K.mol) |
|-----------------------|-------------------------|--------------------------|---------------------------|
| -                     | 76.00                   | 73.76                    | 53.10                     |
| 2 x 10 <sup>-4</sup>  | 57.87                   | 55.20                    | -19.44                    |

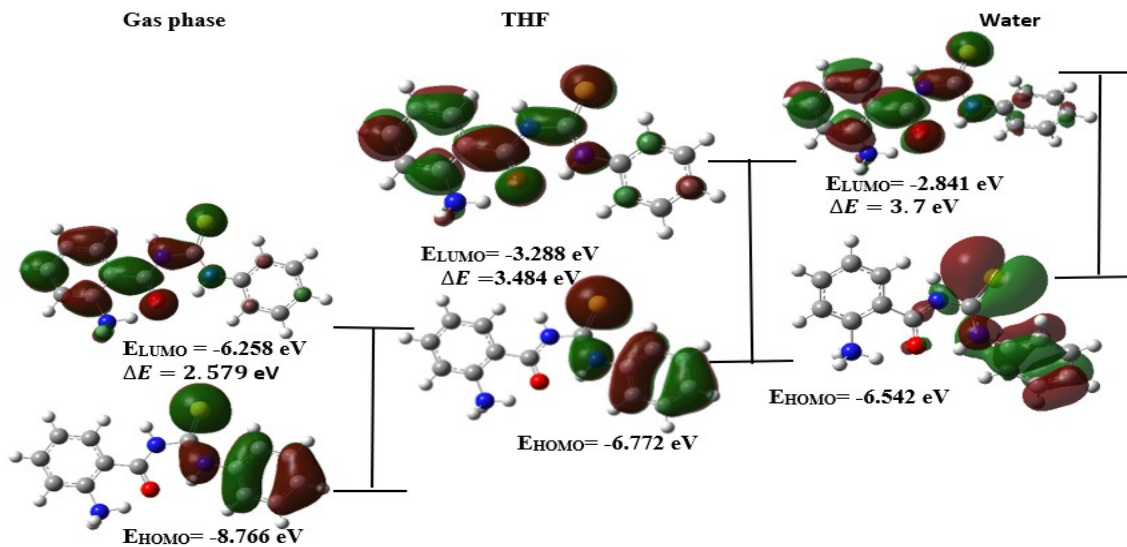

**Figure S9.** Energies of HOMO and LUMO levels of protonated APCB in the gas phase, THF, and water.

**Table S3.** Mulliken charges and Fukui functions of different atoms in neutral APCB in the gas phase.

| <b>Atom</b> | $q_{k+1}$ | $q_k$  | $q_{k-1}$ | $f_k^+$ | $f_k^-$ | $\Delta f$ |
|-------------|-----------|--------|-----------|---------|---------|------------|
| <b>C1</b>   | 0.857     | 0.804  | 0.716     | 0.052   | 0.088   | -0.035     |
| <b>C2</b>   | -0.167    | -0.191 | -0.243    | 0.023   | 0.052   | -0.028     |
| <b>C3</b>   | -0.242    | -0.284 | -0.281    | 0.042   | -0.003  | 0.045      |
| <b>C4</b>   | -0.132    | -0.139 | -0.221    | 0.007   | 0.081   | -0.073     |
| <b>C5</b>   | -0.158    | -0.221 | -0.295    | 0.063   | 0.074   | -0.011     |
| <b>C6</b>   | -0.560    | -0.537 | -0.472    | -0.022  | -0.065  | 0.042      |
| <b>N11</b>  | -0.440    | -0.527 | -0.565    | 0.087   | 0.037   | 0.049      |
| <b>C14</b>  | 0.158     | 0.165  | 0.133     | -0.006  | 0.031   | -0.037     |
| <b>O15</b>  | -0.529    | -0.549 | -0.651    | 0.020   | 0.101   | -0.081     |
| <b>N16</b>  | -0.101    | -0.111 | -0.122    | 0.011   | 0.010   | 0.001      |
| <b>C18</b>  | 0.057     | 0.047  | 0.058     | 0.009   | -0.010  | 0.019      |
| <b>N19</b>  | -0.161    | -0.217 | -0.233    | 0.056   | 0.015   | 0.040      |
| <b>S20</b>  | 0.034     | -0.148 | -0.369    | 0.182   | 0.220   | -0.038     |
| <b>C22</b>  | -0.154    | -0.189 | -0.229    | 0.034   | 0.040   | -0.005     |
| <b>C23</b>  | -0.314    | -0.329 | -0.329    | 0.011   | 0.003   | 0.007      |
| <b>C24</b>  | 0.326     | 0.281  | 0.256     | 0.044   | 0.024   | 0.019      |
| <b>C25</b>  | -0.246    | -0.238 | -0.209    | -0.008  | -0.029  | 0.020      |
| <b>C27</b>  | -0.168    | -0.192 | -0.222    | 0.023   | 0.029   | -0.005     |
| <b>C28</b>  | -0.118    | -0.179 | -0.227    | 0.060   | 0.048   | 0.011      |

**Table S4.** Quantum chemical parameters for protonated **APCB** in the gas phase, THF, and water solvents.

| <b>Parameter</b>                   | <b>Gas-phase</b> | <b>THF</b> | <b>Water</b> |
|------------------------------------|------------------|------------|--------------|
| $E_{\text{HOMO}}$ (eV)             | -8.766           | -6.772     | -6.542       |
| $E_{\text{LUMO}}$ (eV)             | -6.186           | -3.288     | -2.841       |
| $\Delta E$ (eV)                    | 2.579            | 3.484      | 3.700        |
| $\eta$ (eV)                        | 1.289            | 1.742      | 1.850        |
| $\chi$ (eV)                        | 7.476            | 5.030      | 4.692        |
| $\sigma$ (eV) <sup>-1</sup>        | 0.775            | 0.574      | 0.540        |
| $\mu(D)$                           | 15.335           | 20.317     | 21.702       |
| $\Delta N$                         | -0.184           | 0.560      | 0.623        |
| $\Delta G_{\text{solv}}$ (kJ/mol)  | -                | 170.054    | -36.74       |
| $\langle \alpha \rangle$ (au)      | 233.044          | 293.159    | 300.264      |
| Molecular Volume (Å <sup>3</sup> ) | 791.230          | 792.450    | 793.320      |

**Table S5.** Parameters obtained from Monte Carlo simulation.

| <b># molecules</b> | <b>Total Energy<br/>(kcal/mol)</b> | <b>Adsorption Energy<br/>(kcal/mol)</b> | <b>Deformation Energy<br/>(kcal/mol)</b> | <b>Rigid adsorption Energy<br/>(kcal/mol)</b> |
|--------------------|------------------------------------|-----------------------------------------|------------------------------------------|-----------------------------------------------|
| 1                  | -119.379                           | -67.170                                 | -0.830                                   | -66.170                                       |
| 2                  | -239.024                           | -134.569                                | -1.324                                   | -133.244                                      |
| 3                  | -358.487                           | -201.805                                | -2.510                                   | -199.295                                      |
| 4                  | -478.932                           | -270.023                                | -2.991                                   | -267.031                                      |
| 5                  | -599.078                           | -377.941                                | -2.651                                   | -335.290                                      |
| 6                  | -716.635                           | -403.271                                | -3.380                                   | -399.891                                      |

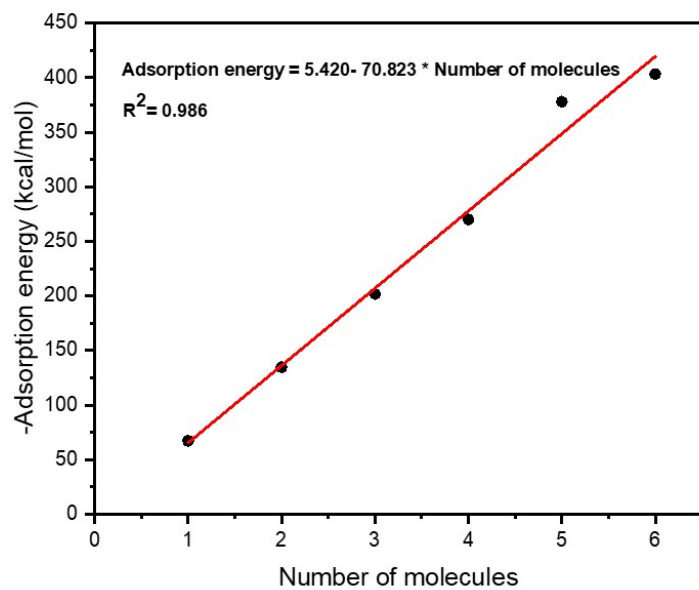

**Fig. S10** Relation between the adsorption energy and number of molecules obtained from MC simulations.
